# Supplementary material for: An International Survey on Grading, Diagnosis, and Management of Immune Effector Cell-Associated Hematotoxicity (ICAHT) Following CAR T-cell Therapy on Behalf of the EBMT and EHA
Source: PubMed Central journal article supplement — Hemasphere. 2023 Apr 27;7(5):e889. doi: 10.1097/HS9.0000000000000889 (PMC10145722; doi:10.1097/hs9.0000000000000889), 2023-04-27

## Supplementary Material

### Supplementary Tables

**Table S1.** Centre Characteristics

| Centre characteristics                                                        |                                                                                                 | N (%)     |
|-------------------------------------------------------------------------------|-------------------------------------------------------------------------------------------------|-----------|
| <b>Is your center administering CAR T-cell therapies?</b>                     | Yes                                                                                             | 72 (89)   |
|                                                                               | No                                                                                              | 9 (11)    |
| <b>Is your center involved in delivering commercial CAR T-cell therapies?</b> | Yes                                                                                             | 61 (94)   |
|                                                                               | No                                                                                              | 4 (6)     |
| <b>Which statement best describes your main practice of CAR-T program</b>     | In a transplantation unit                                                                       | 19 (29)   |
|                                                                               | In a dedicated CAR T-cell unit                                                                  | 7 (11)    |
|                                                                               | In a mixed Transplant/CAR T unit                                                                | 29 (45)   |
|                                                                               | In a hematology/oncology department                                                             | 9 (14)    |
|                                                                               | Other                                                                                           | 1 (1,5)   |
| <b>Which statement best describes your cellular therapy program?</b>          | Fully FACT-JACIE-accredited for alloHCT (accredited/in process of reaccreditation)              | 47 (72)   |
|                                                                               | Fully FACT-JACIE-accredited for autoHCT (accredited/in process of reaccreditation)              | 36 (55)   |
|                                                                               | Fully FACT-JACIE-accredited for IEC (including CART) (accredited/in process of reaccreditation) | 26 (40)   |
|                                                                               | Working towards FACT-JACIE accreditation alloHCT (first accreditation)                          | 6 (9)     |
|                                                                               | Working towards FACT-JACIE accreditation autoHCT (first accreditation)                          | 6 (9)     |
|                                                                               | Working towards FACT-JACIE re-accreditation IEC (including CART) (first accreditation)          | 14 (21.5) |
|                                                                               | Not accredited                                                                                  | 6 (9)     |

**Table S2.** Grading system

| Grading of cytopenias after CAR-T                                      | N (%)   |
|------------------------------------------------------------------------|---------|
| <b>Common Terminology Criteria for Adverse Events (CTCAE, v.5.0)</b>   | 42 (84) |
| <b>Phenotypes of Neutrophil Recovery</b>                               | 3 (6)   |
| <b>Achieving Hematologic Count “Recovery” or “Normalization”</b>       | 2 (4)   |
| <b>Hematopoietic Recovery according to CIBMTR reporting guidelines</b> | 5 (10)  |
| <b>Local/national grading</b>                                          | 2 (4)   |
| <b>Other</b>                                                           | 2 (4)   |

**Table S3.** Risk stratification.

| Do you use a risk-stratification system to determine patient-individual risk of hematological toxicity prior to CAR-T infusion? N (%) |         |
|---------------------------------------------------------------------------------------------------------------------------------------|---------|
| No                                                                                                                                    | 32 (64) |
| Yes                                                                                                                                   | 18 (36) |
| If yes, which classification system?                                                                                                  |         |
| CAR-HEMATOTOX                                                                                                                         | 18 (90) |
| Other                                                                                                                                 | 3 (15)  |

**Table S4.** Selection criteria and Work-up

| Which criteria are you using to identify HLH/MAS in patients with severe hematotoxicity after CAR-T cell therapy? N (%)                                  |           |
|----------------------------------------------------------------------------------------------------------------------------------------------------------|-----------|
| EBMT/EHA criteria                                                                                                                                        | 30 (61)   |
| MD Anderson criteria                                                                                                                                     | 13 (26,5) |
| HScore                                                                                                                                                   | 11 (22)   |
| None                                                                                                                                                     | 2 (4)     |
| Other                                                                                                                                                    | 5 (10)    |
| Do you perform an extensive work-up for CHIP or MDS (incl. next-generation sequencing on a targeted gene panel) in patients with persistent ICAHT? N (%) |           |
| Yes, we initiate these studies in case of persistent ICAHT after approx. 1 month after CAR-T infusion                                                    | 4 (8)     |
| EBMT/EHA Consensus Guidelines on Immune Effector Cell Associated Hematotoxicity (ICAHT)                                                                  | 16 (33)   |
| Yes, we initiate these studies in case of persistent ICAHT after approx. 6 months after CAR-T infusion                                                   | 2 (4)     |
| Yes, we initiate these studies in case of persistent ICAHT after approx. 12 months after CAR-T infusion                                                  | 1 (2)     |
| We do not regularly perform such a work-up for patients with prolonged ICAHT                                                                             | 20 (41)   |
| Other                                                                                                                                                    | 6 (12)    |

Supplementary Figures

Figure S1

***Which statement best describes the main practice of your CAR-T program (i.e. unit in which patients receiving CAR T-cells are generally hospitalized)?***

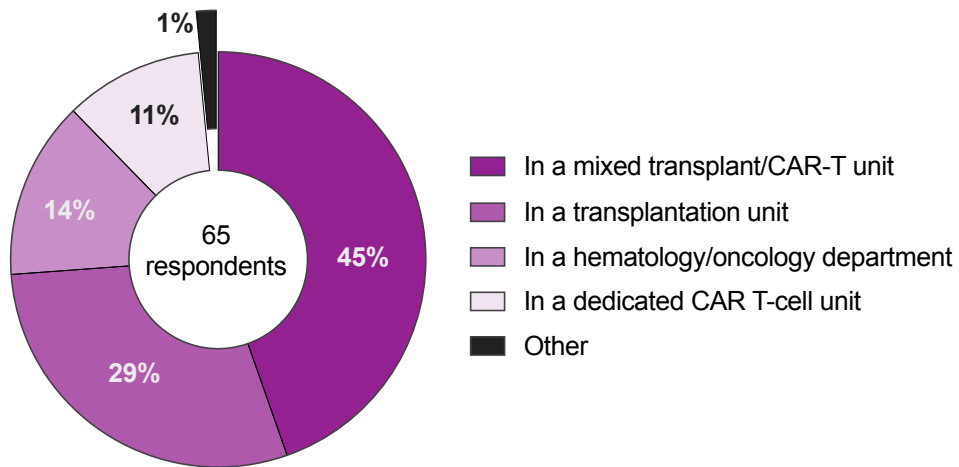

Supplement: hs9-7-e889-s001.pdf [file hs9-7-e889-s001.pdf]
